# Supplementary material for: Assessment of “Sugranineteen” Table Grape Maturation Using Destructive and Auto-Fluorescence Methods
Source: MDPI journal article supplement (doi:10.3390/foods11050663), 2022-02-24
Supplement: s1 [file s1]

Table S1. Relationships between the Multiplex® 3 ratios and the different quality parameters of Sugranineteen table grapes performed in this study. The ratios are described according to the manufacturer (Force A, Orsay, France).

| Ratio   | Description                     | Formula               | Correlation to <sup>1</sup>               | Relationship with <sup>2</sup> | n * | R-sq   | Significance         |
|---------|---------------------------------|-----------------------|-------------------------------------------|--------------------------------|-----|--------|----------------------|
| ANTH_RG | Log of FER_RG                   | log (FRF_R/FRF_G)     | Anthocyanins                              | Anthocyanins                   | 16  | 0.9613 | $p \leq 0.001$ , *** |
|         |                                 |                       |                                           | CIRG                           | 7   | 0.8713 | $p = 0.02$ , *       |
| FERARI  | Log of FRF_R                    | Log (5000/FRF_R)      | Anthocyanins                              | Anthocyanins                   | 16  | 0.8743 | $p \leq 0.001$ , *** |
| FLAV    | Flavonols                       | log<br>(FRF_R/FRF_UV) | Flavonols                                 | Flavonoids                     | 15  | nd     | ns                   |
| SFR_R   | Simple<br>Fluorescence<br>Ratio | FRF_R / RF_R          | Chlorophyll                               | TSS                            | 9   | 0.7954 | $p = 0.001$ , ***    |
|         |                                 |                       |                                           | TA                             | 9   | 0.6186 | $p = 0.012$ , **     |
|         |                                 |                       |                                           | CIRG                           | 10  | 0.7835 | $p = 0.005$ , **     |
| NBI_R   | Nitrogen<br>Balance Index       | FRF_UV / RF_R         | Epidermal<br>phenolics and<br>chlorophyll | Anthocyanins                   | 16  | 0.8032 | $p \leq 0.001$ , *** |
|         |                                 |                       |                                           | Flavonoids                     | 9   | 0.4773 | $p = 0.039$ , *      |

<sup>1</sup>: According to the user guide of Multiplex® 3 and previous studies [17–55], the mentioned ratios are correlated to the corresponding above-mentioned parameters. <sup>2</sup>: Regression equations investigated in this study. n, sample size; R-sq, coefficient of determination ( $R^2$ ); nd, not detected; ns, not significant; TSS, total soluble solids, TA, titratable acidity; CIRG, color index of red grapes. \* Each n represents the mean value of triplicates of laboratory analysis and the relative 196 in-vineyard collected fluorescent measurements.
